# Supplementary material for: Adjusted Indirect Treatment Comparison of Progression-Free Survival with D-Rd and VRd Based on MAIA and SWOG S0777 Individual Patient-Level Data
Source: PubMed Central journal article supplement — Adv Ther. 2024 Mar 18;41(5):1923–37. doi: 10.1007/s12325-024-02807-y (PMC11052858; doi:10.1007/s12325-024-02807-y), 2024-03-18
Supplement: 12325_2024_2807_MOESM1_ESM.pdf [file 12325_2024_2807_MOESM1_ESM.pdf]

## Supplementary Material

### **Adjusted Indirect Treatment Comparison of Progression-free Survival with D-Rd and VRd Based on MAIA and SWOG S0777 Individual Patient-level Data**

Brian G.M. Durie,<sup>1</sup> Shaji K. Kumar,<sup>2</sup> Eric M. Ammann,<sup>3</sup> Alex Z. Fu,<sup>4,5</sup> Shuchita Kaila,<sup>4</sup>  
Annette Lam,<sup>3</sup> Saad Z. Usmani,<sup>6</sup> Thierry Facon<sup>7</sup>

<sup>1</sup>Cedars-Sinai Outpatient Cancer Center, Los Angeles, CA, USA; <sup>2</sup>Department of Hematology, Mayo Clinic Rochester, Rochester, MN, USA; <sup>3</sup>Janssen Global Market Access, Raritan, NJ, USA; <sup>4</sup>Janssen Scientific Affairs, Horsham, PA, USA; <sup>5</sup>Georgetown University Medical Center, Washington, DC, USA; <sup>6</sup>Memorial Sloan Kettering Cancer Center, New York, NY, USA; <sup>7</sup>University of Lille, CHU Lille, Service des Maladies du Sang, Lille, France.

#### **Corresponding author:**

Brian G.M. Durie

Cedars-Sinai Outpatient Cancer Center

8700 Beverly Blvd, Los Angeles, CA 90048

Email: [bdurie@myeloma.org](mailto:bdurie@myeloma.org)

**Table S1. Alignment of key inclusion/exclusion criteria for the MAIA and SWOG S0777 trials**

| <b>Criterion</b>                                          | <b>MAIA</b>               | <b>SWOG S0777</b>         | <b>Alignment</b>                                                                                                                                                                                                                                                                                                                                                                                                                                                                                                                |
|-----------------------------------------------------------|---------------------------|---------------------------|---------------------------------------------------------------------------------------------------------------------------------------------------------------------------------------------------------------------------------------------------------------------------------------------------------------------------------------------------------------------------------------------------------------------------------------------------------------------------------------------------------------------------------|
| NDMM and treatment naïve                                  | Required                  | Required                  | Aligned                                                                                                                                                                                                                                                                                                                                                                                                                                                                                                                         |
| MM diagnostic criteria                                    | ≥1 CRAB criteria met      | ≥1 CRAB criteria met      | Aligned                                                                                                                                                                                                                                                                                                                                                                                                                                                                                                                         |
| Transplant eligibility                                    | Ineligible                | Ineligible and eligible   | Restrict both trial populations to patients aged ≥65 years (proxy for transplant ineligibility)                                                                                                                                                                                                                                                                                                                                                                                                                                 |
| Measurable disease per IMWG at baseline [1,2]             | Required                  | Required                  | Aligned                                                                                                                                                                                                                                                                                                                                                                                                                                                                                                                         |
| ECOG PS score                                             | 0-2                       | 0-3                       | To harmonize the inclusion criteria, patients with a baseline ECOG PS score >2 were excluded from the comparative analyses (MAIA, n = 2; SWOG S0777, n = 4)                                                                                                                                                                                                                                                                                                                                                                     |
| Hemoglobin                                                | ≥7.5 g/dL                 | ≥9 g/dL                   | In terms of inclusion criteria, the MAIA trial required a baseline hemoglobin ≥7.5 g/dL and the SWOG S0777 trial required a hemoglobin ≥9 g/dL, but both trials included patients with hemoglobin <9 g/dL (14% and 8% of MAIA and SWOG S0777 patients, respectively, aged ≥65 years). In the primary analysis of PFS, propensity-score weighting was used to adjust for baseline hemoglobin, but no restriction based on hemoglobin was applied; in a sensitivity analysis, only patients with hemoglobin ≥9 g/dL were included |
| Neutrophil count                                          | ≥1.0 × 10 <sup>9</sup> /L | ≥1.0 × 10 <sup>9</sup> /L | Aligned                                                                                                                                                                                                                                                                                                                                                                                                                                                                                                                         |
| Creatinine clearance                                      | ≥30 mL/min                | >30 mL/min                | Aligned                                                                                                                                                                                                                                                                                                                                                                                                                                                                                                                         |
| Exclusion: NYHA class III/IV cardiac status or recent AMI | Excluded                  | Excluded                  | Aligned                                                                                                                                                                                                                                                                                                                                                                                                                                                                                                                         |

|                                                                                        |                                                                |              |         |
|----------------------------------------------------------------------------------------|----------------------------------------------------------------|--------------|---------|
| Exclusion: uncontrolled infection, HIV infection, hepatitis B or hepatitis C infection | Excluded all                                                   | Excluded all | Aligned |
| Exclusion: prior cancer                                                                | Patients with another malignancy within prior 5 years excluded | Excluded     | Aligned |
| Exclusion: poorly controlled diabetes                                                  | Yes                                                            | Yes          | Aligned |

SWOG, Southwest Oncology Group; NDMM, newly diagnosed multiple myeloma; MM, multiple myeloma; CRAB, calcium elevation, renal impairment, anemia, bone involvement; IMWG, International Myeloma Working Group; ECOG PS, Eastern Cooperative Oncology Group performance status; PFS, progression-free survival; NYHA, New York Heart Association; AMI, acute myocardial infarction; HIV, human immunodeficiency virus.

**Table S2. Baseline patient characteristics before and after multiple imputation and propensity-score weighting for the MAIA trial**

| Covariate                       | Unweighted        |                 |
|---------------------------------|-------------------|-----------------|
|                                 | D-Rd<br>(n = 363) | Rd<br>(n = 364) |
| Age, mean (SD), years           | 74.19 (5.11)      | 74.38 (5.39)    |
| Female, n (%)                   | 178 (49.0)        | 171 (47.0)      |
| ISS disease stage, n (%)        |                   |                 |
| I                               | 97 (26.7)         | 102 (28.0)      |
| II                              | 163 (44.9)        | 153 (42.0)      |
| III                             | 103 (28.4)        | 109 (29.9)      |
| ECOG PS score, n (%)            |                   |                 |
| 0                               | 126 (34.7)        | 121 (33.2)      |
| 1                               | 176 (48.5)        | 186 (51.1)      |
| ≥2                              | 61 (16.8)         | 57 (15.7)       |
| Hemoglobin, n (%)               |                   |                 |
| <10 g/dL                        | 134 (36.9)        | 122 (33.5)      |
| eGFR, n (%)                     |                   |                 |
| <60 mL/min/1.73 m <sup>2</sup>  | 137 (37.7)        | 102 (28.0)      |
| LDH                             |                   |                 |
| ≥190 U/L, n/N (%) <sup>a</sup>  | 176/346 (50.9)    | 181/355 (51.0)  |
| Missing, n (%)                  | 17 (4.7)          | 9 (2.5)         |
| Cytogenetic risk                |                   |                 |
| High risk, n/N (%) <sup>b</sup> | 47/315 (14.9)     | 44/318 (13.8)   |
| Missing, n (%)                  | 48 (13.2)         | 46 (12.6)       |

D-Rd, daratumumab plus lenalidomide/dexamethasone; Rd, lenalidomide/dexamethasone; SD, standard deviation; ISS, International Staging System; ECOG PS, Eastern Cooperative Oncology Group performance status; eGFR, estimated glomerular filtration rate; LDH, lactate dehydrogenase.

<sup>a</sup>The denominator for the LDH ≥190 U/L percentage calculation was n = 346 for the D-Rd arm and n = 355 for the Rd arm due to missing data.

<sup>b</sup>High cytogenetic risk was defined in MAIA as the presence of ≥1 high-risk cytogenetic abnormality (del17p, t[14;16], or t[4;14]). The denominator for the high cytogenetic risk percentage calculation was n = 315 for the D-Rd arm and n = 318 for the Rd arm due to missing data.

**Table S3. Baseline patient characteristics before multiple imputation and propensity-score weighting for the SWOG S0777 trial**

| Covariate                      | Unweighted      |                 |
|--------------------------------|-----------------|-----------------|
|                                | VRd<br>(n = 91) | Rd<br>(n = 107) |
| Age, mean (SD), years          | 73.36 (5.58)    | 72.07 (5.0)     |
| Female, n (%)                  | 33 (36.3)       | 47 (43.9)       |
| ISS disease stage, n (%)       |                 |                 |
| I                              | 20 (22.0)       | 19 (17.8)       |
| II                             | 38 (41.8)       | 52 (48.6)       |
| III                            | 33 (36.3)       | 36 (33.6)       |
| ECOG PS score, n (%)           |                 |                 |
| 0                              | 36 (39.6)       | 42 (39.3)       |
| 1                              | 49 (53.8)       | 53 (49.5)       |
| ≥2                             | 6 (6.6)         | 12 (11.2)       |
| Hemoglobin, n (%)              |                 |                 |
| <10 g/dL                       | 29 (31.9)       | 33 (30.8)       |
| eGFR, n (%)                    |                 |                 |
| <60 mL/min/1.73 m <sup>2</sup> | 45 (49.5)       | 48 (44.9)       |
| LDH                            |                 |                 |
| ≥190 U/L, n/N <sup>a</sup>     | 39/90 (43.3)    | 37/107 (34.6)   |
| Missing, n (%)                 | 1 (1.1)         | 0               |
| Cytogenetic risk               |                 |                 |
| High risk, n/N <sup>b</sup>    | 6/54 (11.1)     | 11/68 (16.2)    |
| Missing, n (%)                 | 37 (40.7)       | 39 (36.4)       |

SWOG, Southwest Oncology Group; VRd, bortezomib plus lenalidomide/dexamethasone; Rd, lenalidomide/dexamethasone; SD, standard deviation; ISS, International Staging System; ECOG PS, Eastern Cooperative Oncology Group performance status; eGFR, estimated glomerular filtration rate; LDH, lactate dehydrogenase.

<sup>a</sup>The denominator for the LDH ≥190 U/L percentage calculation was n = 90 for the VRd arm due to missing data.

<sup>b</sup>High cytogenetic risk was defined in SWOG S0777 as the presence of ≥1 high-risk cytogenetic abnormality (del[17p], t[14;16], or t[4;14]). The denominator for the high cytogenetic risk percentage calculation was n = 54 for the VRd arm and n = 68 for the Rd arm due to missing data.

**Figure S1. Anchored ITC study design for MAIA versus SWOG S0777.**

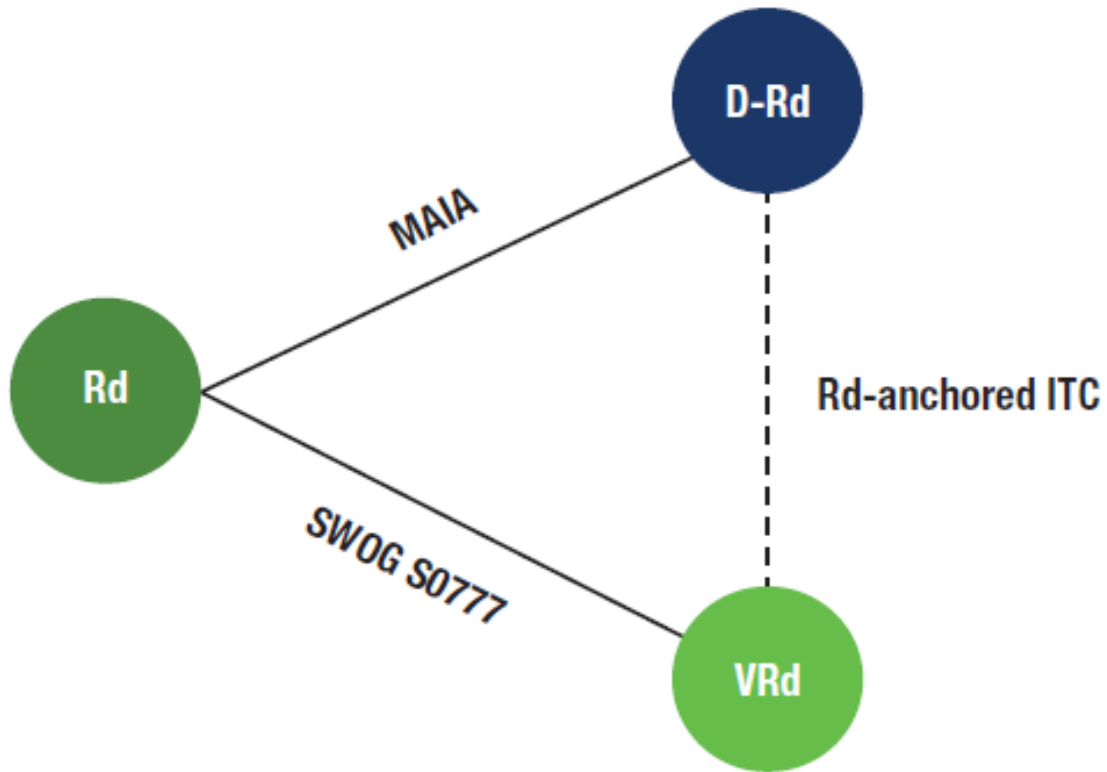

ITC, indirect treatment comparison; SWOG, Southwest Oncology Group;  
Rd, lenalidomide/dexamethasone; D-Rd, daratumumab plus lenalidomide/dexamethasone;  
VRd, bortezomib plus lenalidomide/dexamethasone.

## References

1. Durie BGM, Harousseau JL, Miguel JS, et al. International uniform response criteria for multiple myeloma. *Leukemia*. 2006;20(9):1467-73.
2. Rajkumar SV, Harousseau JL, Durie B, et al. Consensus recommendations for the uniform reporting of clinical trials: report of the International Myeloma Workshop Consensus Panel 1. *Blood*. 2011;117(18):4691-5.
